# Supplementary material
Source: MDPI journal article supplement (https://www.mdpi.com/2073-4344/13/2/254)
Supplement: s1 [file s1]

## *Supplementary Material*

# **g-C<sub>3</sub>N<sub>4</sub> as photocatalyst for the removal of Metronidazole antibiotic from aqueous matrices under lab and pilot scale conditions**

**Christos Lykos<sup>1</sup>, Sotirios Sioulas<sup>1</sup>, Ioannis Konstantinou<sup>1,2\*</sup>**

<sup>1</sup> Department of Chemistry, University of Ioannina, Ioannina, 45110, Greece

<sup>2</sup> Institute of Environment and Sustainable Development, University Research Center of Ioannina (URCI), Ioannina 45110, Greece

\*Correspondence: iokonst@uoi.gr

**Figure S1.** Total ion current (TIC) and extracted pseudo-molecular ion  $[M+H]^+$  (EIC) chromatograms of MTZ and its TPs (lab scale conditions).

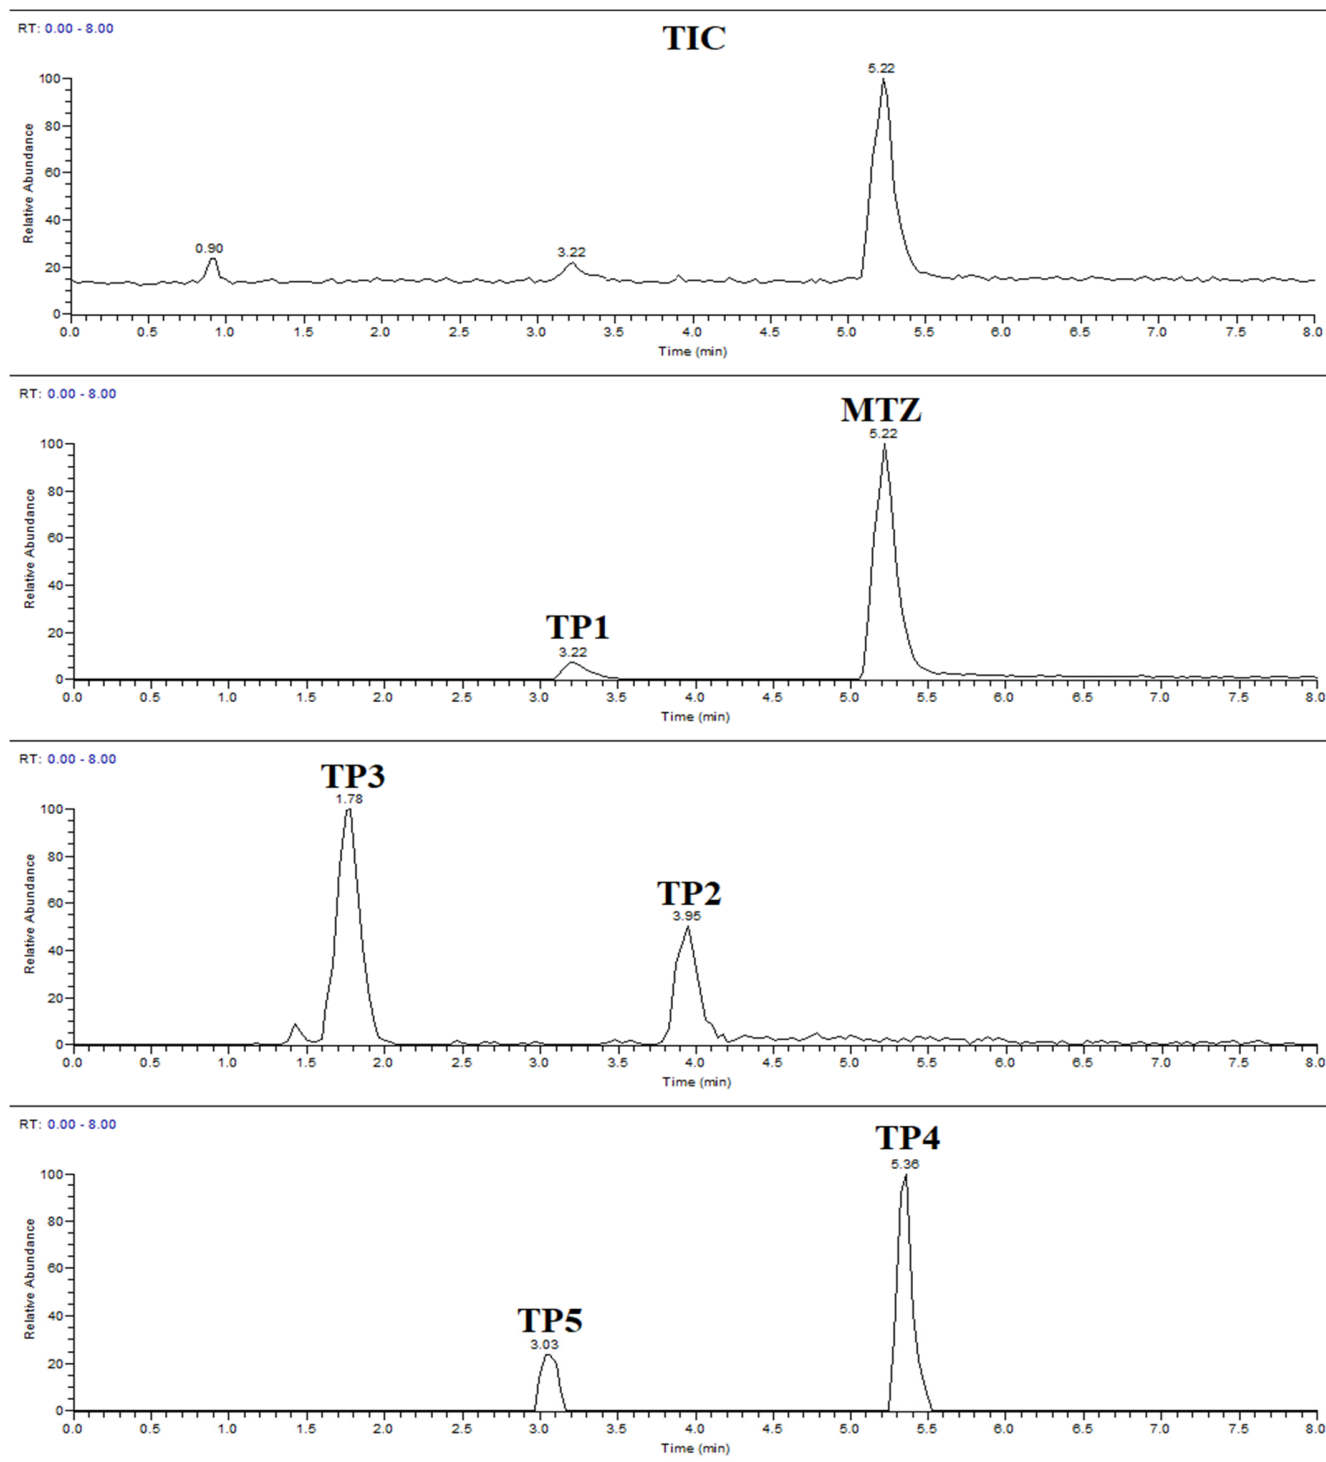

RT: 0.00 - 8.00

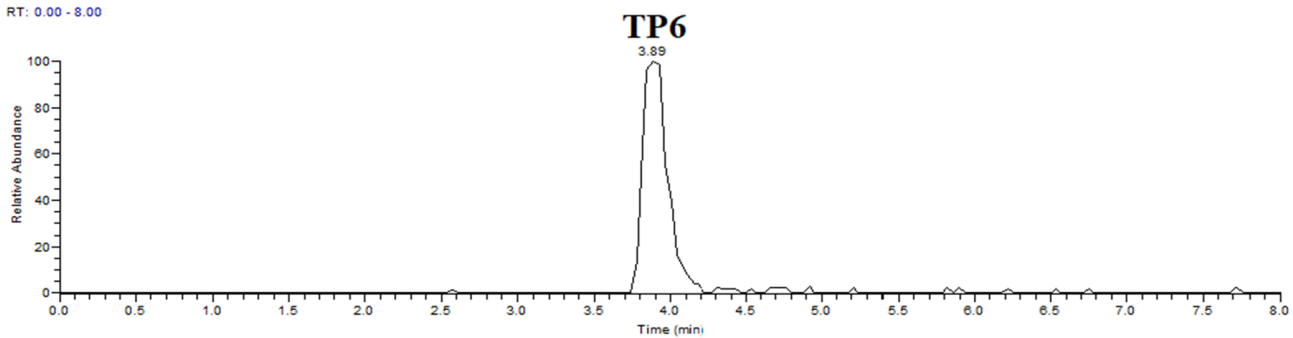

RT: 0.00 - 8.00

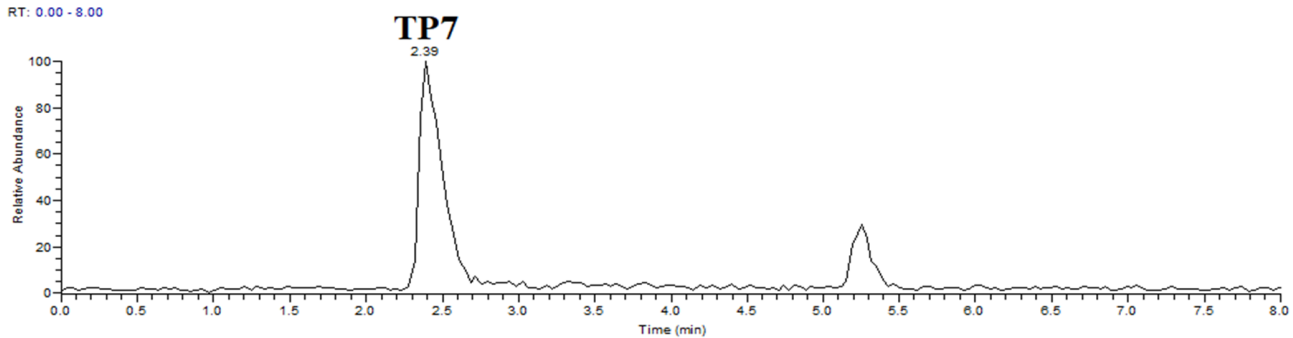

RT: 0.00 - 8.00

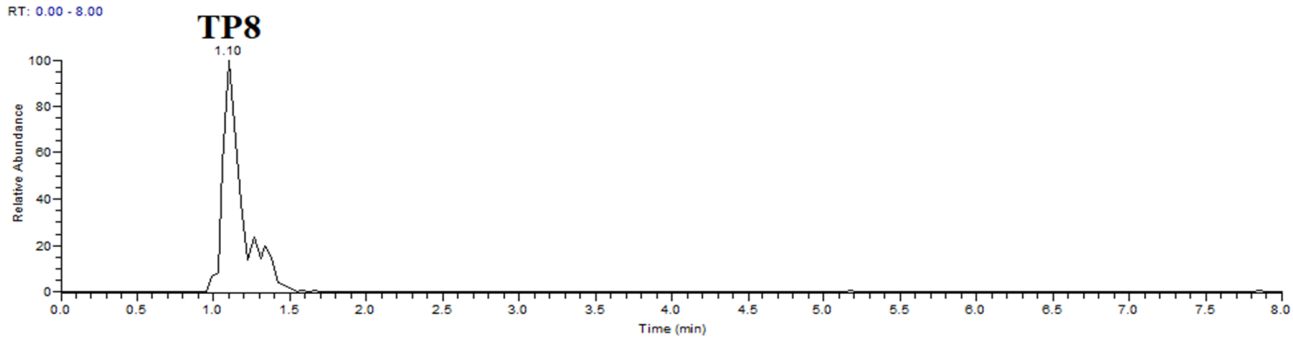

**Figure S2.** Mass spectra of MTZ and its TPs formed under lab scale conditions

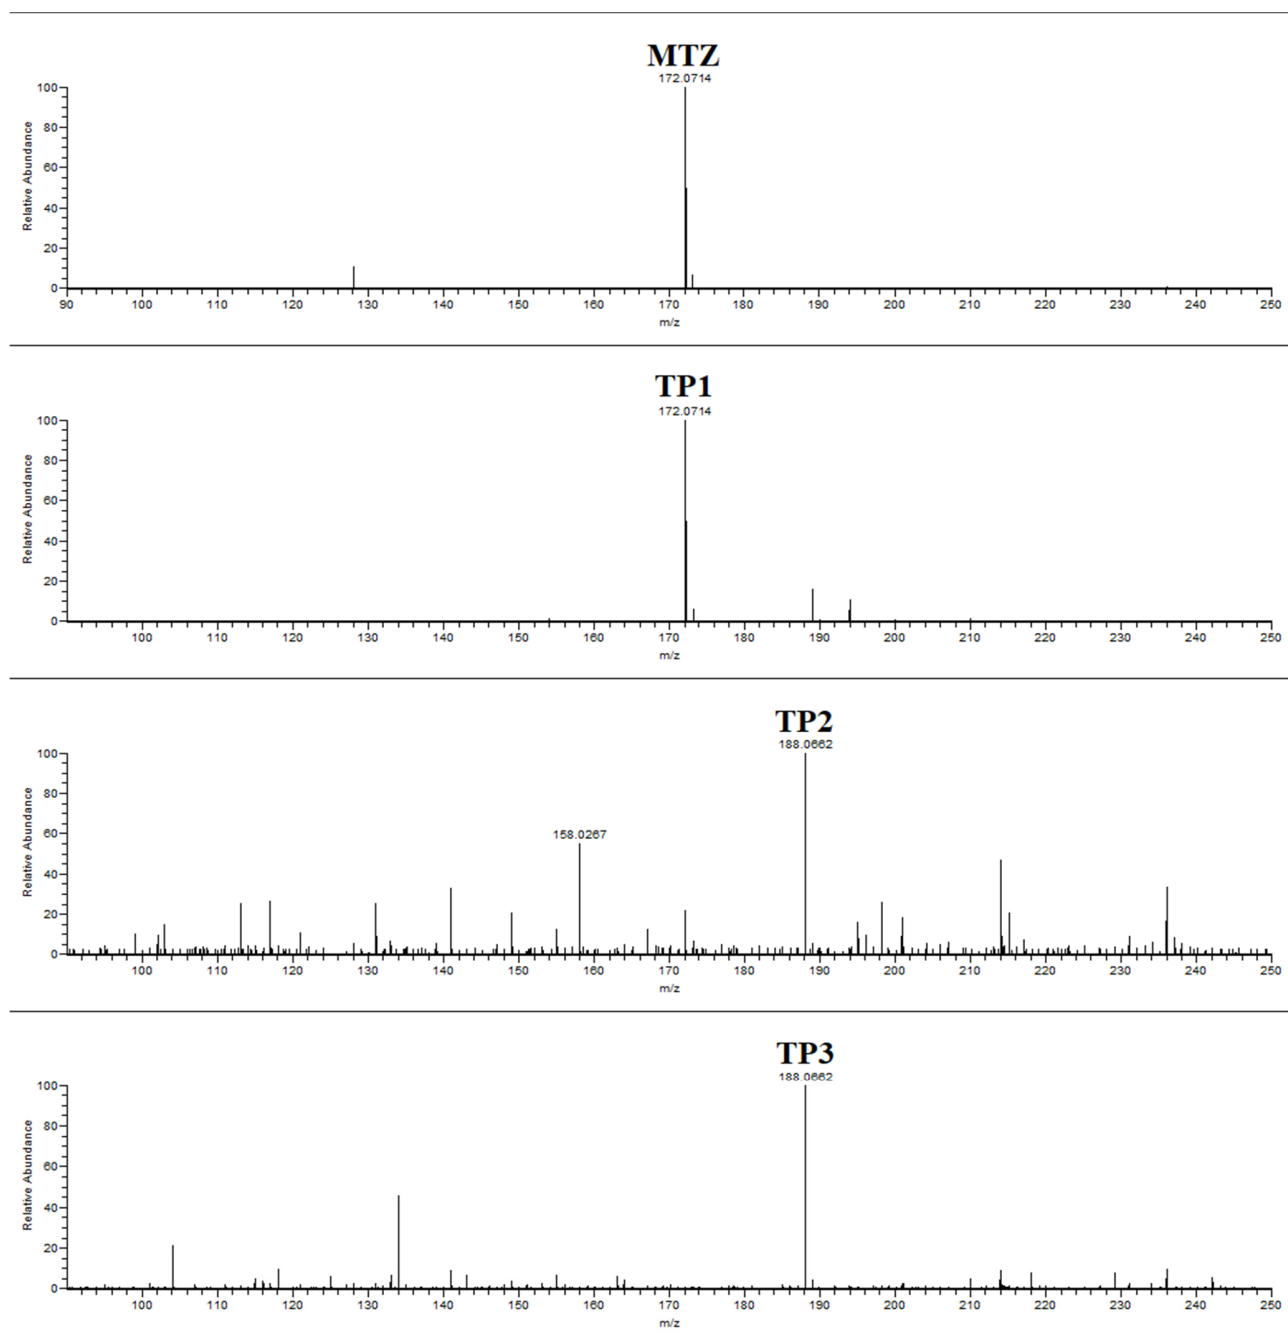

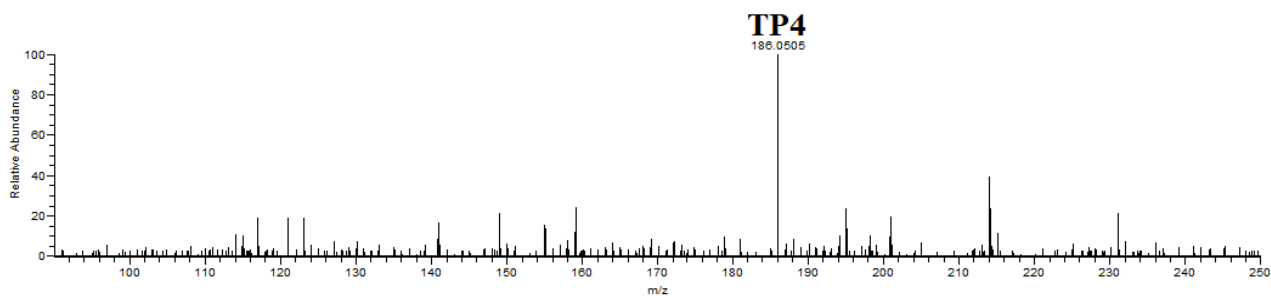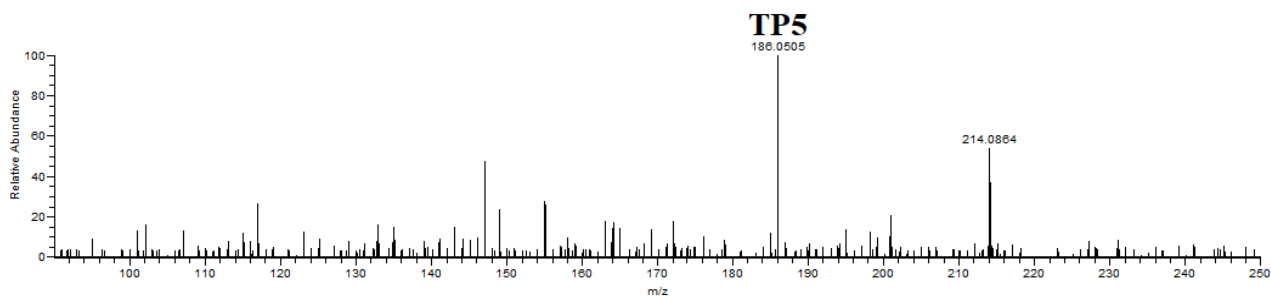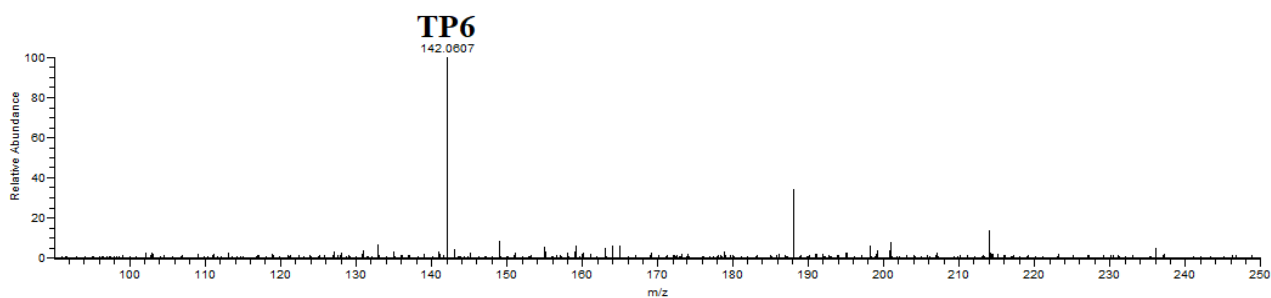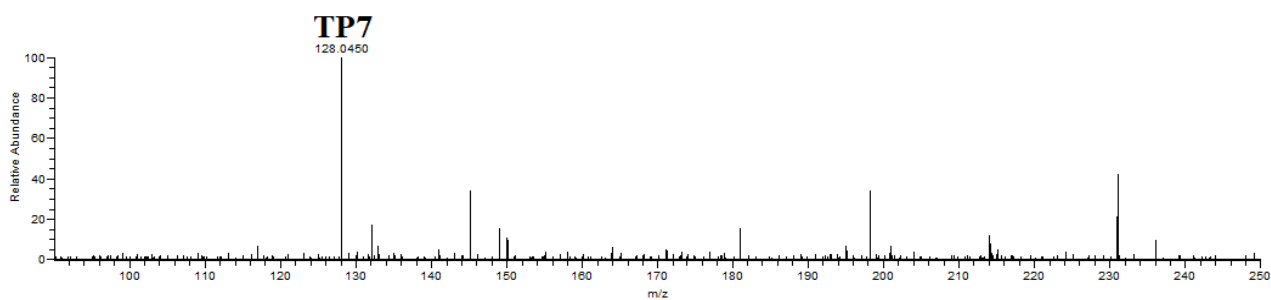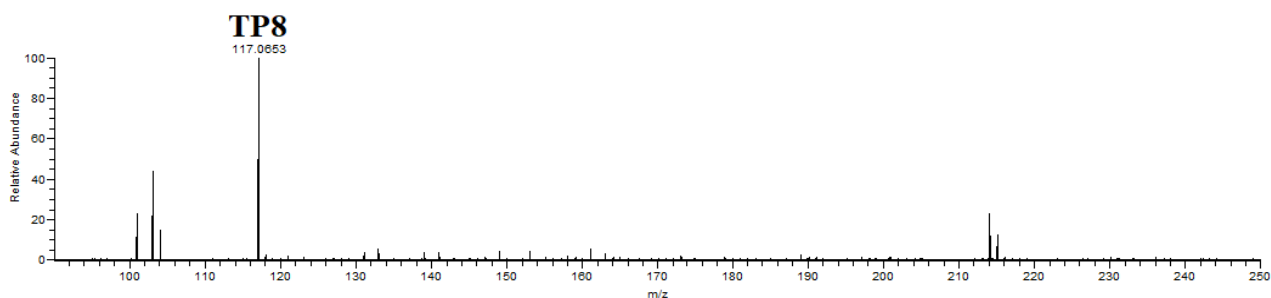

**Table S1.** High resolution mass data of MTZ and its TPs

| Compound | t <sub>R</sub><br>(min) | [M+H] <sup>+</sup> /[M+Na]<br>+ | Molecular<br>Formula                                         | Δ<br>(ppm) | RD<br>B | MS <sup>2</sup> /MS <sup>3</sup><br>[M+H] <sup>+</sup> | Molecular<br>Formula                                        | Δ<br>(ppm) | RD<br>B |
|----------|-------------------------|---------------------------------|--------------------------------------------------------------|------------|---------|--------------------------------------------------------|-------------------------------------------------------------|------------|---------|
| MTZ      | 5.22                    | 172.0714                        | C <sub>6</sub> H <sub>10</sub> O <sub>3</sub> N <sub>3</sub> | -1.846     | 3.5     | MS <sup>2</sup>                                        |                                                             |            |         |
|          |                         |                                 |                                                              |            |         | 128.0449                                               | C <sub>4</sub> H <sub>6</sub> O <sub>2</sub> N <sub>3</sub> | -4.475     | 3.5     |
|          |                         |                                 |                                                              |            |         | MS <sup>3</sup>                                        |                                                             |            |         |
| TP1      | 3.22                    | 172.0714                        | C <sub>6</sub> H <sub>10</sub> O <sub>3</sub> N <sub>3</sub> | -1.498     | 3.5     | 82.0517                                                | C <sub>4</sub> H <sub>6</sub> N <sub>2</sub>                | -9.991     | 3.0     |
|          |                         |                                 |                                                              |            |         | MS <sup>2</sup>                                        |                                                             |            |         |
|          |                         |                                 |                                                              |            |         | 154.0606                                               | C <sub>6</sub> H <sub>8</sub> O <sub>2</sub> N <sub>3</sub> | -3.330     | 4.5     |
|          |                         |                                 |                                                              |            |         | 128.0449                                               | C <sub>4</sub> H <sub>6</sub> O <sub>2</sub> N <sub>3</sub> | -4.475     | 3.5     |
|          |                         |                                 |                                                              |            |         | 88.0385                                                | C <sub>3</sub> H <sub>6</sub> O <sub>2</sub> N              | -8.916     | 1.5     |
|          |                         |                                 |                                                              |            |         | 85.0390                                                | C <sub>3</sub> H <sub>5</sub> ON <sub>2</sub>               | -7.636     | 2.5     |
| TP2      | 3.95                    | 188.0662                        | C <sub>6</sub> H <sub>10</sub> O <sub>4</sub> N <sub>3</sub> | -2.033     | 3.5     | MS <sup>3</sup>                                        |                                                             |            |         |
|          |                         |                                 |                                                              |            |         | -                                                      |                                                             |            |         |
|          |                         |                                 |                                                              |            |         | MS <sup>2</sup>                                        |                                                             |            |         |
|          |                         |                                 |                                                              |            |         | 170.0556                                               | C <sub>6</sub> H <sub>8</sub> O <sub>3</sub> N <sub>3</sub> | -2.750     | 4.5     |
| TP3      | 1.78                    | 188.0662                        | C <sub>6</sub> H <sub>10</sub> O <sub>4</sub> N <sub>3</sub> | -2.139     | 3.5     | 128.0448                                               | C <sub>4</sub> H <sub>6</sub> O <sub>2</sub> N <sub>3</sub> | -5.100     | 3.5     |
|          |                         |                                 |                                                              |            |         | MS <sup>3</sup>                                        |                                                             |            |         |
|          |                         |                                 |                                                              |            |         | -                                                      |                                                             |            |         |
|          |                         |                                 |                                                              |            |         | MS <sup>2</sup>                                        |                                                             |            |         |
|          |                         |                                 |                                                              |            |         | 170.0552                                               | C <sub>6</sub> H <sub>8</sub> O <sub>3</sub> N <sub>3</sub> | -4.749     | 4.5     |
|          |                         |                                 |                                                              |            |         | 128.0448                                               | C <sub>4</sub> H <sub>6</sub> O <sub>2</sub> N <sub>3</sub> | -6.271     | 3.5     |
|          |                         |                                 |                                                              |            |         | MS <sup>3</sup>                                        |                                                             |            |         |

|     |      |          |                                                             |        |     |                 |                                                |        |     |  |
|-----|------|----------|-------------------------------------------------------------|--------|-----|-----------------|------------------------------------------------|--------|-----|--|
|     |      |          |                                                             |        |     | -               |                                                |        |     |  |
| TP4 | 5.36 | 186.0505 | C <sub>6</sub> H <sub>8</sub> O <sub>4</sub> N <sub>3</sub> | -2.753 | 4.5 | -               |                                                |        |     |  |
| TP5 | 3.03 | 186.0505 | C <sub>6</sub> H <sub>8</sub> O <sub>4</sub> N <sub>3</sub> | -2.753 | 4.5 | -               |                                                |        |     |  |
| TP6 | 3.89 | 142.0607 | C <sub>5</sub> H <sub>8</sub> O <sub>2</sub> N <sub>3</sub> | -3.119 | 3.5 | MS <sup>2</sup> |                                                |        |     |  |
|     |      |          |                                                             |        |     | 85.0389         | C <sub>3</sub> H <sub>5</sub> ON <sub>2</sub>  | -8.459 | 2.5 |  |
|     |      |          |                                                             |        |     | MS <sup>3</sup> |                                                |        |     |  |
|     |      |          |                                                             |        |     | -               |                                                |        |     |  |
| TP7 | 2.39 | 128.0450 | C <sub>4</sub> H <sub>6</sub> O <sub>2</sub> N <sub>3</sub> | -3.303 | 3.5 | MS <sup>2</sup> |                                                |        |     |  |
|     |      |          |                                                             |        |     | 85.0389         | C <sub>3</sub> H <sub>5</sub> ON <sub>2</sub>  | -7.048 | 2.5 |  |
|     |      |          |                                                             |        |     | MS <sup>3</sup> |                                                |        |     |  |
|     |      |          |                                                             |        |     | -               |                                                |        |     |  |
| TP8 | 1.10 | 117.0653 | C <sub>4</sub> H <sub>9</sub> O <sub>2</sub> N <sub>2</sub> | -4.306 | 1.5 | MS <sup>2</sup> |                                                |        |     |  |
|     |      |          |                                                             |        |     | 100.0386        | C <sub>4</sub> H <sub>6</sub> O <sub>2</sub> N | -7.447 | 2.5 |  |
|     |      |          |                                                             |        |     | MS <sup>3</sup> |                                                |        |     |  |
|     |      |          |                                                             |        |     | -               |                                                |        |     |  |

---

\* tr: retention time, [M+H]<sup>+</sup>/[M+Na]<sup>+</sup>: pseudo-molecular, Δ(ppm): relative mass error, RDB: aromatic ring double bond equivalents

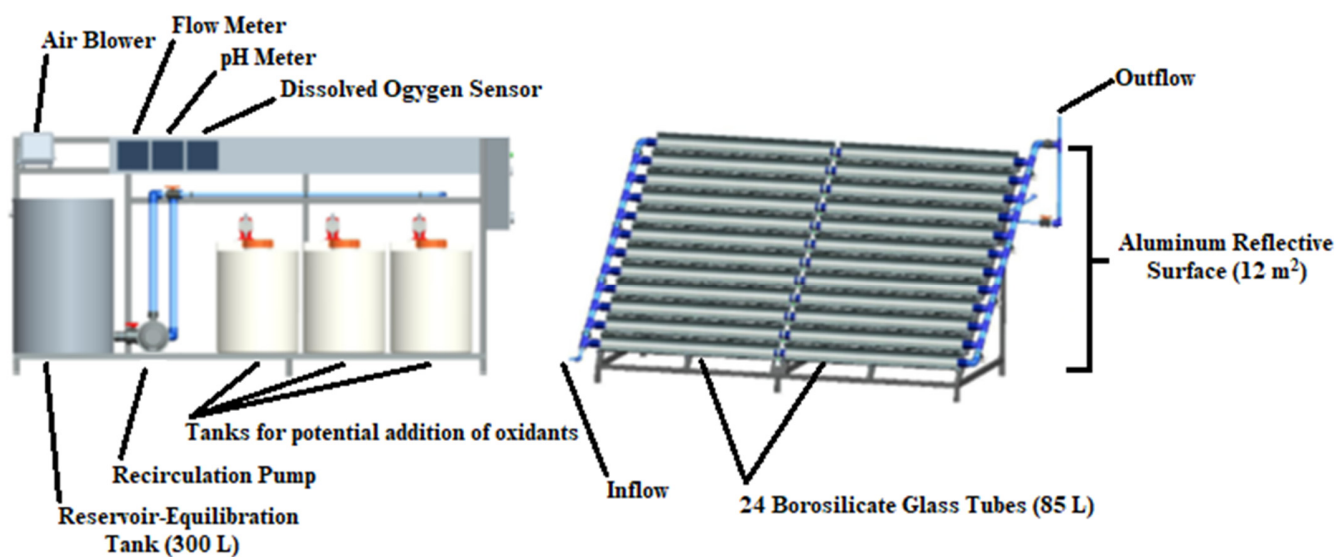

**Scheme S1.** Schematic diagram of the compound parabolic collector (CPC) pilot plant reactor.

**Table S2.** Gradient elution program for the separation MTZ and its TPs.

| Analysis Time<br>(min) | Eluent ratio (%) |          |
|------------------------|------------------|----------|
|                        | Eluent A         | Eluent B |
| 0.0                    | 95               | 5        |
| 2.0                    | 95               | 5        |
| 3.0                    | 90               | 10       |
| 5.0                    | 90               | 10       |
| 10.0                   | 50               | 50       |
| 13.0                   | 95               | 5        |
| 18.0                   | 95               | 5        |



**Table S3.** LTQ-Orbitrap instrumentation operational parameters

| MS Parameters         | Values     |
|-----------------------|------------|
| Resolution            | 60000 FWHM |
| Full Scan             | 90-600 Da  |
| Mass Tolerance        | ≤ 5 ppm    |
| Auxiliary Gas Flow    | 10 a.u.    |
| Sheath Gas            | 35 a.u.    |
| Spray Voltage         | 4,0 kV     |
| Collision Energy      | 35 eV      |
| Capillary Temperature | 320 °C     |
| Capillary Voltage     | 50 V       |
| Tube Lens             | 90 V       |
